# Supplementary material
Source: PubMed Central journal article supplement (PMC3111014)
Supplement: NIHMS287003-supplement-Supp_Fig_S1-S2___Table_S1-_S4.pdf [file NIHMS287003-supplement-Supp_Fig_S1-S2___Table_S1-_S4.pdf]

# SUPPORTING INFORMATION

## **Alanyl-Phosphatidylglycerol Synthase:**

### **Mechanism of Substrate Recognition during tRNA-dependent Lipid**

#### **Modification in *Pseudomonas aeruginosa***

**Stefanie Hebecker<sup>1</sup>, Wiebke Arendt<sup>1</sup>, Ilka U. Heinemann<sup>2</sup>, Jana H. J. Tiefenau<sup>1</sup>,**

**Manfred Nimtz<sup>3</sup>, Manfred Rohde<sup>4</sup>, Dieter Söll<sup>2</sup>, and Jürgen Moser<sup>1\*</sup>**

<sup>1</sup> Institute of Microbiology, Technische Universität Braunschweig, 38106 Braunschweig, Germany

<sup>2</sup> Department of Molecular Biophysics and Biochemistry, Yale University, New Haven, CT 06520-8114, USA

<sup>3</sup> Helmholtz Centre for Infection Research, Department of Structural Biology, 38124 Braunschweig, Germany

<sup>4</sup> Helmholtz Centre for Infection Research, Microbial Pathogenesis, 38124 Braunschweig, Germany

\* For correspondence.

Dr. Jürgen Moser

Phone: +49 531 391 5808, Fax: +49 531 391 5854

E-mail: j.moser@tu-bs.de

## Supplemental Table S1

TABLE S1. **Enzymatic activity of A-PGS<sub>543-881</sub> after chemical modification or treatment with chelating agents under *in vitro* and modified *in vitro* (using Ala-tRNA<sup>Ala</sup>) conditions.**

A-PGS was purified in the absence of reducing agents and subsequently modified with phenylmethylsulfonyl fluoride, diisopropylfluorophosphate and p-hydroxyphenylglyoxal, respectively. After an extensive dialysis step proteins were subjected to the standard *in vitro* and modified *in vitro* A-PGS<sub>543-881</sub> assays as described under “Experimental Procedures”. Ethylenediaminetetraacetic acid and 1,10-phenanthroline, respectively, were added directly to the assays. The relative *in vitro* activity and activity in modified *in vitro* assays of the corresponding unmodified A-PGS<sub>543-881</sub> was set as 100 %, and all other values were related to this value. Assays were performed in duplicate, standard deviation  $\pm$  10 %. n.t. = not tested.

| Modifying / chelating agent     | Concentration [mM] | Relative activity in <i>in vitro</i> assays [%] | Relative activity in modified <i>in vitro</i> assays [%] |
|---------------------------------|--------------------|-------------------------------------------------|----------------------------------------------------------|
| phenylmethylsulfonyl fluoride   | 0.1                | 100                                             | n.t.                                                     |
|                                 | 1                  | 100                                             | n.t.                                                     |
| diisopropylfluorophosphate      | 0.1                | 100                                             | n.t.                                                     |
|                                 | 1                  | 100                                             | n.t.                                                     |
| p-hydroxyphenylglyoxal          | 0.5                | 90                                              | n.t.                                                     |
|                                 | 1                  | 90                                              | 100                                                      |
|                                 | 5                  | 60                                              | n.t.                                                     |
|                                 | 10                 | 60                                              | 100                                                      |
| ethylenediaminetetraacetic acid | 3                  | 100                                             | 100                                                      |
|                                 | 10                 | 100                                             | 100                                                      |
|                                 | 20                 | n.t.                                            | 100                                                      |
| 1,10-phenanthroline             | 1                  | 100                                             | n.t.                                                     |
|                                 | 3                  | n.t.                                            | 100                                                      |
|                                 | 5                  | n.t.                                            | 75                                                       |
|                                 | 10                 | 45                                              | 35                                                       |
|                                 | 20                 | n.t.                                            | 20                                                       |

## Supplemental Table S2

TABLE S2. **Determination of metal ion content of purified A-PGS<sub>543-881</sub>.**

Purified GST-A-PGS<sub>543-881</sub> protein was concentrated (10.5 mg/ml – 161  $\mu$ M) and subjected to inductively coupled plasma - mass spectrometry (ICP-MS) experiments. In parallel the sole GST protein (4 mg/ml – 154  $\mu$ M) was analyzed to determine the background level of the employed purification strategy. Experiments were performed in duplicate.

| <b>Metal ion</b> | <b>Concentration of metal ion in GST-A-PGS<sub>543-881</sub> [<math>\mu</math>M]</b> | <b>Concentration of metal ion in GST [<math>\mu</math>M]</b> |
|------------------|--------------------------------------------------------------------------------------|--------------------------------------------------------------|
| Fe <sup>2+</sup> | 4.3                                                                                  | 1.6                                                          |
| Ni <sup>2+</sup> | 0.2                                                                                  | 0.2                                                          |
| Cu <sup>2+</sup> | 0.3                                                                                  | 0.2                                                          |
| Mg <sup>2+</sup> | 18.8                                                                                 | 1.2                                                          |
| Mn <sup>2+</sup> | 0.4                                                                                  | 0.02                                                         |
| Zn <sup>2+</sup> | 0.9                                                                                  | 0.2                                                          |

## Supplemental Table S3

TABLE S3. Primers used in this study.

The sequence for T7 promoter is underlined; restriction sites are shown in italics. Exchanged nucleotides for mutagenesis of *P. aeruginosa* A-PGS are in bold.

| Primer |               |                                            |
|--------|---------------|--------------------------------------------|
| 1      | 5pGPaBamf     | GTAGGATCCC <i>CGCGCGGCACC</i>              |
| 2      | 6pGPaXhor     | GATCTCGAGTCAGCGTTTCACCAATC                 |
| 3      | QCA856NSTOPfw | CTACCTGGCCGTGCCAAACTAGGGCTCGACCCGCTGGTG    |
| 4      | QCA856NSTOPrv | CACCAGCGGGTTCGAGCCCTAGTTTGGCACGGCCAGGTAG   |
| 5      | 27alaSNdeIfw  | ATAGCCATATGAAAAGCGCTGAAATCCG               |
| 6      | 28alaSBclIrv  | ATAGCTGATCATCAGAGCCCTTGCTCGAC              |
| 7      | D579Afw       | GCCCTGACCGGCGCTAAGGCCCTGCTC                |
| 8      | D579Arv       | GAGCAGGGCCTTAGCGCCGGTCAGGGC                |
| 9      | D579Nfw       | GCCCTGACCGGCAACAAGGCCCTGCTC                |
| 10     | D579Nrv       | GAGCAGGGCCTTGTTGCCGGTCAGGGC                |
| 11     | K580Sfw       | CCCTGACCGGCGACTCTGCCCTGCTCTTCC             |
| 12     | K580Srev      | GGAAGAGCAGGGCAGAGTCGCCGGTCAGGG             |
| 13     | K580Qfw       | CTGACCGGCGACCAGGCCCTGCTCTTC                |
| 14     | K580Qrev      | GAAGAGCAGGGCCTGGTCGCCGGTCAG                |
| 15     | Y635Afw       | CCCGCCCGGTGTTCGCTCAGGTGCGTGCCG             |
| 16     | Y635Arev      | CGGCACGCACCTGAGCGAACACCGGGCGGG             |
| 17     | K654Sfw       | GGCCTGACCGCCCTCTCTCTCGGCGAAGAAGC           |
| 18     | K654Srev      | GCTTCTTCGCCGAGAGAGAGGGCGGTCAGGCC           |
| 19     | K654Qfw       | CTGACCGCCCTCCAGCTCGGCGAAGAAG               |
| 20     | K654Qrev      | CTTCTTCGCCGAGCTGGAGGGCGGTCAG               |
| 21     | E657Dfw       | CTCAAGCTCGGCGACGAAGCGCGAGTC                |
| 22     | E657Drv       | GACTCGCGCTTCGTCGCCGAGCTTGAG                |
| 23     | E657Qfw       | CCTCAAGCTCGGCCAGGAAGCGCGAGTCG              |
| 24     | E657Qrv       | CGACTCGCGCTTCCTGGCCGAGCTTGAGG              |
| 25     | E658Dfw       | CAAGCTCGGCGAAGACGCGCGAGTCGAC               |
| 26     | E658Drv       | GTCGACTCGCGCTTTCGCCGAGCTTG                 |
| 27     | E658Qfw       | CTCAAGCTCGGCGAACAGGGCGCGAGTCGACC           |
| 28     | E658Qrv       | GGTCGACTCGCGCCTGTTCCGCCGAGCTTGAG           |
| 29     | S709Afw       | GAGCTGAAGGCGATAGCTGACGCCTGGCTG             |
| 30     | S709Arv       | CAGCCAGGCGTCAGCTATCGCCTTCAGCTC             |
| 31     | S709Nfw       | GAGCTGAAGGCGATAA <b>AC</b> GACGCCTGGCTGGGC |
| 32     | S709Nrv       | GCCCAGCCAGGCGTCGTTTATCGCCTTCAGCTC          |
| 33     | D710Afw       | GAAGGCGATATCGGCTGCCTGGCTGGGCGG             |
| 34     | D710Arv       | CCGCCAGCCAGGCAGCCGATATCGCCTTC              |
| 35     | D710Nfw       | CTGAAGGCGATATCGAACGCCTGGCTGGGC             |
| 36     | D710Nrv       | GCCCAGCCAGGCGTTCGATATCGCCTTCAG             |
| 37     | E720Qfw       | GCAAGCAGGTGCGCCAGAAAGGCTTCTCCC             |
| 38     | E720Qrv       | GGGAGAAGCCTTTCTGGCGCACCTGCTTGC             |
| 39     | S724Afw       | CGCGAGAAAGGCTTCGCTCTGGGCCGCTTCAC           |

|    |            |                                                                                                         |
|----|------------|---------------------------------------------------------------------------------------------------------|
| 40 | S724Arv    | GTGAAGCGGCCAGAGCGAAGCCTTTCTCGCG                                                                         |
| 41 | S724Nfw    | CGCGAGAAAGGCTTCAACCTGGGCCGCTTACC                                                                        |
| 42 | S724Nrv    | GGTGAAGCGGCCAGGTTGAAGCCTTTCTCGCG                                                                        |
| 43 | Y732Afw    | CCGCTTACCCCGGCGGCTCTGAACTTCTTCCGC                                                                       |
| 44 | Y732Arev   | GCGGAAGAAGTTCAGAGCCGCCGGGTGAAGCGG                                                                       |
| 45 | S763Afw    | GCCGCGAACTGGCGGCTCTCGACCTGATGCGC                                                                        |
| 46 | S763Arv    | GCGCATCAGGTCGAGAGCCGCCAGTTCGCGGC                                                                        |
| 47 | S763Nfw    | CGCGAACTGGCGAACCTCGACCTGATGC                                                                            |
| 48 | S763Nrv    | GCATCAGGTCGAGGTTCCGCCAGTTCGCG                                                                           |
| 49 | D765Afw    | GAACTGGCGAGCCTCGCTCTGATGCGCGTG                                                                          |
| 50 | D765Arev   | CACGCGCATCAGAGCGAGGCTCGCCAGTTC                                                                          |
| 51 | D765Nfw    | CTGGCGAGCCTCAACCTGATGCGCG                                                                               |
| 52 | D765Nrev   | CGCGCATCAGGTTGAGGCTCGCCAG                                                                               |
| 53 | R768Sfw    | GAGCCTCGACCTGATGTCTGTGCACCCGGACGCG                                                                      |
| 54 | R768Srev   | CGCGTCCGGGTGCACAGACATCAGGTCGAGGCTC                                                                      |
| 55 | R768Qfw    | CCTCGACCTGATGCAGGTGCACCCGGACG                                                                           |
| 56 | R768Qrev   | CGTCCGGGTGCACCTGCATCAGGTCGAGG                                                                           |
| 57 | M778Afw    | CGCGCCGAAGCTGACCGCTGAGTTCCTCATGCTC                                                                      |
| 58 | M778Arev   | GAGCATGAGGAACTCAGCGGTCAGTTCGGCGCG                                                                       |
| 59 | Y831Afw    | GCGGGGCGAACAGTTCGCTAATTTCCAGGGGCTGC                                                                     |
| 60 | Y831Arev   | GCAGCCCCTGGAAATTAGCGAACTGTTCCGCCCCG                                                                     |
| 61 | R837Sfw    | CTACAATTTCCAGGGGCTGTCTCGTTCAAGGACAAGTTC                                                                 |
| 62 | R837Srev   | GGAACCTGTCTTGAAGCGAGACAGCCCCTGGAAATTGTAG                                                                |
| 63 | R837Qfw    | CTACAATTTCCAGGGGCTGCAGCGTTCAAGGACAAGTTC                                                                 |
| 64 | R837Qrev   | GAACTTGTCTTGAAGCGCTGCAGCCCCTGGAAATTGTAG                                                                 |
| 65 | K840Sfw    | CAGGGGCTGCGACGCTTCTCTGACAAGTTCAGCCC                                                                     |
| 66 | K840Srev   | GGGCTGGAACCTTGTGAGAGAAGCGTCGAGCCCCTG                                                                    |
| 67 | K840Qfw    | GCTGCGACGCTTCCAGGACAAGTTCAGC                                                                            |
| 68 | K840Qrev   | GCTGGAACCTTGTCTTGAAGCGTCGACG                                                                            |
| 69 | K842Sfw    | CTGCGACGCTTCAAGGACTCTTTCCAGCCCCGACTGGG                                                                  |
| 70 | K842Srev   | CCCAGTCGGGCTGGAAAGAGTCCTTGAAGCGTCGAG                                                                    |
| 71 | K842Qfw    | GACGCTTCAAGGACCAGTTCAGCCCCGAC                                                                           |
| 72 | K842Qrev   | GTCGGGCTGGAACCTGGTCCTTGAAGCGTC                                                                          |
| 73 | alatRNA1fw | AATTCTAATACGACTCACTATAGGGGCCATAGCTCAGCTGGGAGAGCGCCTG<br>CTTTGCACGCAGGAGGTCAGGAGTTCGATCCTCCTTGCTCCACCAG  |
| 74 | alatRNA1rv | GATCCTGGTGGAGCCAAGGAGGATCGAACTCCTGACCTCCTGCGTGCAAAG<br>CAGGCGCTCTCCAGCTGAGCTATGGCCCCATAGTGAGTCGTATTAG   |
| 75 | alatRNA2fw | AATTCTAATACGACTCACTATAGGGGCTATAGCTCAGCTGGGAGAGCGCTTG<br>CATGGCATGCAAGAGGTCGACGTTTCGATCCCGTCTAGCTCCACCAG |
| 76 | alatRNA2rv | GATCCTGGTGGAGCTAGACGGGATCGAACCGTCGACCTCTTGCATGCCATGC<br>AAGCGCTCTCCAGCTGAGCTATAGCCCCATAGTGAGTCGTATTAG   |

## Supplemental Table S4

TABLE S4. *E. coli* strains and plasmids used in this study.

| Bacterial strain or plasmid |                                     | Genotype or phenotype                                                                                                                                                                                                                                                | Reference                               |
|-----------------------------|-------------------------------------|----------------------------------------------------------------------------------------------------------------------------------------------------------------------------------------------------------------------------------------------------------------------|-----------------------------------------|
| <i>E. coli</i>              |                                     |                                                                                                                                                                                                                                                                      |                                         |
|                             | BL21 (λDE3)                         | B <sup>-</sup> F <sup>-</sup> <i>dcm ompT hsdS</i> (r <sub>B</sub> <sup>-</sup> m <sub>B</sub> <sup>-</sup> ) <i>gal</i> λ(DE3)                                                                                                                                      | Stratagene, La Jolla, USA               |
|                             | Rosetta (DE3) pLysS                 | F <sup>-</sup> <i>ompT hsdS</i> <sub>B</sub> (r <sub>B</sub> <sup>-</sup> m <sub>B</sub> <sup>-</sup> ) <i>gal dcm</i> (DE3) pLysSRARE <sup>2</sup> (Cam <sup>r</sup> )                                                                                              | Novagen, Darmstadt, Germany             |
|                             | TOP10                               | F <sup>-</sup> <i>mcrA</i> Δ( <i>mrr-hsdRMS-mcrBC</i> ) Φ80 <i>lacZ</i> Δ M15 Δ <i>lacX74 recA1 ara</i> Δ139 Δ( <i>ara-leu</i> )7697 <i>galU galK rpsL</i> (Str <sup>r</sup> ) <i>endA1 nupG</i>                                                                     | Invitrogen (Grant <i>et al.</i> , 1990) |
|                             | K-12, strain AG1, clone JW2667      | <i>recA1 endA1 gyrA96 thi-1 hsdR17</i> (rK <sup>-</sup> mK <sup>+</sup> ) <i>supE44 relA1</i> carrying plasmid pCA24N which encodes for AlaRS from <i>E. coli</i> , Cam <sup>r</sup>                                                                                 | (Kitagawa <i>et al.</i> , 2005)         |
|                             | K-12, strain AG1, clone JW2498      | <i>recA1 endA1 gyrA96 thi-1 hsdR17</i> (rK <sup>-</sup> mK <sup>+</sup> ) <i>supE44 relA1</i> carrying plasmid pCA24N which encodes for HisRS from <i>E. coli</i> , Cam <sup>r</sup>                                                                                 | (Kitagawa <i>et al.</i> , 2005)         |
| Plasmids                    |                                     |                                                                                                                                                                                                                                                                      |                                         |
|                             | pBADmyc-His-A/PA0920                | pBADmyc-His-A containing PA0920 gene fused to the sequence for C-terminal His <sub>6</sub> -tag cloned between <i>Hind</i> III and <i>Nco</i> I sites, Ap <sup>r</sup>                                                                                               | (Klein <i>et al.</i> , 2009)            |
|                             | pBAD-His-A/PA0920                   | pBAD-His-A containing the PA0920 gene fused to the sequence for N-terminal His <sub>6</sub> -tag cloned between <i>Xho</i> I and <i>Hind</i> III sites, Ap <sup>r</sup>                                                                                              | (Klein <i>et al.</i> , 2009)            |
|                             | pBAD-His-A/PA0920 <sub>1-855N</sub> | pBAD-His-A/PA0920-derivative, deletion of amino acids 857 – 881, amino acid exchange alanine 856 to asparagine                                                                                                                                                       | This work                               |
|                             | pGEX-6P-1/PA0920Δaa1-542            | Expression vector for <i>E. coli</i> carrying base pairs 1627 - 2643 of ORF PA0920 cloned into <i>Bam</i> HI/ <i>Xho</i> I sites, <i>tac</i> -promoter, sequence for an N-terminal GST-tag with specific restriction site for PreScission™ Protease, Ap <sup>r</sup> | This work                               |
|                             | pGEX-6P-1/PA0920Δaa1-542 D579A      | pGEX-6P-1/PA0920Δaa1-542-derivative, amino acid exchange aspartate 579 to alanine                                                                                                                                                                                    | This work                               |
|                             | pGEX-6P-1/PA0920Δaa1-542 D579N      | pGEX-6P-1/PA0920Δaa1-542-derivative, amino acid exchange aspartate 579 to asparagine                                                                                                                                                                                 | This work                               |
|                             | pGEX-6P-1/PA0920Δaa1-542 K580S      | pGEX-6P-1/PA0920Δaa1-542-derivative, amino acid exchange lysine 580 to serine                                                                                                                                                                                        | This work                               |
|                             | pGEX-6P-1/PA0920Δaa1-542 K580Q      | pGEX-6P-1/PA0920Δaa1-542-derivative, amino acid exchange lysine 580 to glutamine                                                                                                                                                                                     | This work                               |
|                             | pGEX-6P-1/PA0920Δaa1-542 Y635A      | pGEX-6P-1/PA0920Δaa1-542-derivative, amino acid exchange tyrosine 635 to alanine                                                                                                                                                                                     | This work                               |
|                             | pGEX-6P-1/PA0920Δaa1-542 K654S      | pGEX-6P-1/PA0920Δaa1-542-derivative, amino acid exchange lysine 654 to serine                                                                                                                                                                                        | This work                               |
|                             | pGEX-6P-1/PA0920Δaa1-542 K654Q      | pGEX-6P-1/PA0920Δaa1-542-derivative, amino acid exchange lysine 654 to glutamine                                                                                                                                                                                     | This work                               |
|                             | pGEX-6P-1/PA0920Δaa1-542 E657D      | pGEX-6P-1/PA0920Δaa1-542-derivative, amino acid exchange glutamate 657 to aspartate                                                                                                                                                                                  | This work                               |

|                                       |                                                                                         |           |
|---------------------------------------|-----------------------------------------------------------------------------------------|-----------|
| pGEX-6P-1/<br>PA0920Δaa1-542<br>E657Q | pGEX-6P-1/PA0920Δaa1-542-derivative, amino acid exchange<br>glutamate 657 to glutamine  | This work |
| pGEX-6P-1/<br>PA0920Δaa1-542<br>E658D | pGEX-6P-1/PA0920Δaa1-542-derivative, amino acid exchange<br>glutamate 658 to aspartate  | This work |
| pGEX-6P-1/<br>PA0920Δaa1-542<br>E658Q | pGEX-6P-1/PA0920Δaa1-542-derivative, amino acid exchange<br>glutamate 658 to glutamine  | This work |
| pGEX-6P-1/<br>PA0920Δaa1-542<br>S709A | pGEX-6P-1/PA0920Δaa1-542-derivative, amino acid exchange<br>serine 709 to alanine       | This work |
| pGEX-6P-1/<br>PA0920Δaa1-542<br>S709N | pGEX-6P-1/PA0920Δaa1-542-derivative, amino acid exchange<br>serine 709 to asparagine    | This work |
| pGEX-6P-1/<br>PA0920Δaa1-542<br>D710A | pGEX-6P-1/PA0920Δaa1-542-derivative, amino acid exchange<br>aspartate 710 to alanine    | This work |
| pGEX-6P-1/<br>PA0920Δaa1-542<br>D710N | pGEX-6P-1/PA0920Δaa1-542-derivative, amino acid exchange<br>aspartate 710 to asparagine | This work |
| pGEX-6P-1/<br>PA0920Δaa1-542<br>E720Q | pGEX-6P-1/PA0920Δaa1-542-derivative, amino acid exchange<br>glutamate 720 to glutamine  | This work |
| pGEX-6P-1/<br>PA0920Δaa1-542<br>S724A | pGEX-6P-1/PA0920Δaa1-542-derivative, amino acid exchange<br>serine 724 to alanine       | This work |
| pGEX-6P-1/<br>PA0920Δaa1-542<br>S724N | pGEX-6P-1/PA0920Δaa1-542-derivative, amino acid exchange<br>serine 724 to asparagine    | This work |
| pGEX-6P-1/<br>PA0920Δaa1-542<br>Y732A | pGEX-6P-1/PA0920Δaa1-542-derivative, amino acid exchange<br>tyrosine 732 to alanine     | This work |
| pGEX-6P-1/<br>PA0920Δaa1-542<br>S763A | pGEX-6P-1/PA0920Δaa1-542-derivative, amino acid exchange<br>serine 763 to alanine       | This work |
| pGEX-6P-1/<br>PA0920Δaa1-542<br>S763N | pGEX-6P-1/PA0920Δaa1-542-derivative, amino acid exchange<br>serine 763 to asparagine    | This work |
| pGEX-6P-1/<br>PA0920Δaa1-542<br>D765A | pGEX-6P-1/PA0920Δaa1-542-derivative, amino acid exchange<br>aspartate 765 to alanine    | This work |
| pGEX-6P-1/<br>PA0920Δaa1-542<br>D765N | pGEX-6P-1/PA0920Δaa1-542-derivative, amino acid exchange<br>aspartate 765 to asparagine | This work |
| pGEX-6P-1/<br>PA0920Δaa1-542<br>R768S | pGEX-6P-1/PA0920Δaa1-542-derivative, amino acid exchange<br>arginine 768 to serine      | This work |
| pGEX-6P-1/<br>PA0920Δaa1-542<br>R768Q | pGEX-6P-1/PA0920Δaa1-542-derivative, amino acid exchange<br>arginine 768 to glutamine   | This work |
| pGEX-6P-1/<br>PA0920Δaa1-542<br>M778A | pGEX-6P-1/PA0920Δaa1-542-derivative, amino acid exchange<br>methionin 768 to alanine    | This work |

|                                         |                                                                                                                                                                                                                                                                    |           |
|-----------------------------------------|--------------------------------------------------------------------------------------------------------------------------------------------------------------------------------------------------------------------------------------------------------------------|-----------|
| pGEX-6P-1/<br>PA0920Δaa1-542<br>Y831A   | pGEX-6P-1/PA0920Δaa1-542-derivative, amino acid exchange tyrosine 831 to alanine                                                                                                                                                                                   | This work |
| pGEX-6P-1/<br>PA0920Δaa1-542<br>R837S   | pGEX-6P-1/PA0920Δaa1-542-derivative, amino acid exchange arginine 837 to serine                                                                                                                                                                                    | This work |
| pGEX-6P-1/<br>PA0920Δaa1-542<br>R837Q   | pGEX-6P-1/PA0920Δaa1-542-derivative, amino acid exchange arginine 837 to glutamine                                                                                                                                                                                 | This work |
| pGEX-6P-1/<br>PA0920Δaa1-542<br>K840S   | pGEX-6P-1/PA0920Δaa1-542-derivative, amino acid exchange lysine 840 to serine                                                                                                                                                                                      | This work |
| pGEX-6P-1/<br>PA0920Δaa1-542<br>K840Q   | pGEX-6P-1/PA0920Δaa1-542-derivative, amino acid exchange lysine 840 to glutamine                                                                                                                                                                                   | This work |
| pGEX-6P-1/<br>PA0920Δaa1-542<br>K842S   | pGEX-6P-1/PA0920Δaa1-542-derivative, amino acid exchange lysine 842 to serine                                                                                                                                                                                      | This work |
| pGEX-6P-1/<br>PA0920Δaa1-542<br>K842Q   | pGEX-6P-1/PA0920Δaa1-542-derivative, amino acid exchange lysine 842 to glutamine                                                                                                                                                                                   | This work |
| pGEX-6P-1/<br>A-PGS <sub>543-855N</sub> | pGEX-6P-1/PA0920Δaa1-542-derivative, deletion of amino acids 857 – 881, amino acid exchange alanine 856 to asparagine                                                                                                                                              | This work |
| pET28b(+)/PA0903                        | Expression vector for <i>E. coli</i> carrying the gene encoding alanyl-tRNA-synthetase (ORF PA0903) cloned into <i>NdeI/BamHI</i> sites, T7-promoter, sequence for an N-terminal His-tag, Kan <sup>r</sup>                                                         | This work |
| pUC18tRNA <sup>Ala1</sup>               | pUC18 containing ORF PA4280.3 (coding for tRNA <sup>Ala1</sup> ) from <i>P. aeruginosa</i> cloned into the <i>EcoRI</i> and <i>BamHI</i> restriction sites of the MCS under control of a T7 promoter and with a 3' <i>BstNI</i> restriction site, Ap <sup>r</sup>  | This work |
| pUC119tRNA <sup>Ala2</sup>              | pUC119 containing ORF PA3133.2 (coding for tRNA <sup>Ala2</sup> ) from <i>P. aeruginosa</i> cloned into the <i>EcoRI</i> and <i>BamHI</i> restriction sites of the MCS under control of a T7 promoter and with a 3' <i>BstNI</i> restriction site, Ap <sup>r</sup> | This work |



## Supplemental Figure S1

FIG. S1. Sequence alignment of orthologous aa-PGS proteins.

Homologous aa-PGS proteins from *Listeria monocytogenes* (Lm), *Listeria innocua* (Li), *Clostridium perfringens* MprF2 (Cp2), *Staphylococcus aureus* (Sa), *Staphylococcus epidermis* (Se), *Staphylococcus xylosus* (Sx), *Bacillus cereus* (Bc), *Bacillus anthracis* (Ba), *Bacillus subtilis* (Bs), *Clostridium perfringens* MprF1 (Cp1) and *Pseudomonas aeruginosa* (Pa). Partially conserved positions are boxed in gray, completely conserved positions in black. The first amino acid of the soluble A-PGS<sub>543-881</sub> variant from *P. aeruginosa* is highlighted in red. The proposed C-terminal helix is underlined. Amino acid positions that have been mutagenized by site-directed mutagenesis and point mutations that have been analyzed in the present study are indicated.

### CLUSTAL 2.0.12 multiple sequence alignment

```
Lm      HLWLVGFVGVFIAVVS543LVIIYYLSTTKEKLGSPFEAVKVREHLAKWG-GNEVSHTMFLR 546
Li      HLWLVGFVGVFIAVVS543LVIIYYLSTTKEKLGSPFEAVKVREHLAKWG-GNEVSHTMFLR 546
Cp2     KFGFIAFALVTVIYVAIYFLNIRRKIPVKTFDQCSEYIEK--IIEEYK-GDSLTHLVFLK 539
Sa      VLRYFFWLTLIIAIIIGMIAWLFDYQFSKVRISSEKIEDCEEIINQYG-GNYLSHLIYSG 545
Se      LLRYFFWITILLVILIVGLIAWLFDYKFERPHRMTDVSICESIIHEYG-GNYLSHLVYSG 545
Sx      ILRYFFWITILLVAIIVGVIVVWFYRYSNSRDNATCESIIDKYN-GNYLSHLMYSG 545
Bc      VKRSALAAAFVPTFLLIGSLIANRYRNEFPGQPANDKRLQNFLDEHG-GNVLSHLGFLG 563
Ba      VKRSALAAAFVPTFLLIGSLIANRYRNEFPGQPANDKRLQNFLDEHG-GNVLSHLGFLG 563
Bs      ITHATIMAIIVPLFFLI543FTVVYHK-RTKPIGEKADPERLAAFLNEKG-GNALSHLGFLG 556
Cp1     YLRIALFTYISFII543FVIIWYLTMPKIEDDERYMDADLEKVS543KFFKEIDYGTIFSHLVYLK 265
Pa      ALRAALGSCILLLALALG543WLLAAPP543AI543REP543N-AEELQRAARIIRHSD--QPDGGLALTG 578
```

```
Lm      DKLLFWAAEGEVLFSYRIIADK543MVIMGEPTGNMDKMEAAIEEVMNADRFGYRPFY543EV543R 606
Li      DKLLFWAAEGEVLFSYRIIADK543MVIMGEPTGNMEKMEDAIEEVMNADRFGYRPFY543EV543R 606
Cp2     DKYIYLNE543DKDLFIQYEVYGD543KL543FV543LG543NPVGN543NENL543FREIEK543FCEYAD543NYG543YTPV543FYQ543VN 599
Sa      DKQFF543TNENK543TAF543LMY543RK543ASSL543VV543LG543DPLGDENAFDELLEAFY543NYAEY543LG543YDV543IF543YQ543VT 605
Se      DKDC543FIDENEK543AFL543MY543RK543SNTL543VV543LG543DP543IGDPNTFESLLEK543FYQ543FAEY543RGY543NIIF543YQ543IS 605
Sx      DKK543FFINDN543KDAF543VMY543RHN543NTY543IIL543GD543PIGNSE543SFYSLLEAFY543KEAEY543LG543YDIIF543YQ543VT 605
Bc      DKQFF543FSSDG543KALL543LFSIT543GKRL543VV543LG543DPIGDPSSYRTVLQEEFLAEADRFGYICV543FYQ543IE 623
Ba      DKQFF543FSSDG543KALL543LFSIT543GKRL543VV543LG543DPIGDPSSYRTVLQEEFLAEADRFGYICV543FYQ543IE 623
Bs      DKR543FYFSSDGNALL543LFGK543IARR543L543VV543LG543DPSGQRESFPLVLEEF543LNEAHQ543KGFSV543LFYQ543IE 616
Cp1     DKK543VFWANE543GESLIMYSKYKDKIIVL543GD543PIATKENLYSCIEEFQAFTNLYGYDVV543FY543EIE 325
Pa      DKALL543FHESDDAFLMYARRGRSMIALYD543PIGPAMQRAELI543WQ543FRDLCDLHHARPV543FY543QVR 638
```

D579 -> D579A, D579N

K580 -> K580S, K580Q

Y635 -> Y635A

```
Lm      GTMIPYLHDFG543FD543FI543KL543GEE543GFV543DV543QNF543TMS--GKKKKGERALM543NK543LRE543GYT543FEI543IE543PP 664
Li      GTMIPYLHDFG543FD543FI543KL543GEE543GFV543DV543QNF543TMS--GKKKKGERALM543NK543LRE543GYT543FEI543IQ543PP 664
Cp2     EEMISYLHNSG543YDFM543KI543GEE543AK543V543DV543KE543FK543VV--GNKMKSLK543TSR543SK543VT543KE543GYT543FHM543VE543PP 657
Sa      DQHMPYLHNF543GNQ543FF543KL543GEE543AI543DL543TQ543F543TS--GKKRRGF543RAT543L543NK543FDEL543NI543SFEI543IE543PP 663
Se      DRHMPYLHNF543GNQ543FF543KL543GEE543AI543DL543T543F543T543S--GKKRRGF543RAT543L543NK543IEDL543NI543SFEI543IE543PP 663
Sx      DKYMSLYHSE543GNQ543FF543KL543GEE543AV543IN543L543T543S543F543T543S--GKKKRGL543RAT543L543NK543LDDL543GY543SFE543VLE543PP 663
Bc      SKWMSLYHDF543GYN543FF543KL543GEE543AV543DL543NT543F543T543IT--GKKRAGM543RAT543F543NR543FERE543GYT543FSI543HQ543PP 681
Ba      SKWMSLYHDF543GYN543FF543KL543GEE543AV543DL543NT543F543T543IT--GKKRAGM543RAT543F543NR543FERE543GYT543FSI543HQ543PP 681
Bs      REDMALYHDF543GYN543FF543KL543GEE543AY543VD543LN543T543F543TLT--GKKKAGL543RAI543NNR543FERE543EY543TFH543VD543H543PP 674
Cp1     EKNFSTYHDA543GY543FF543KL543GEE543AR543IDL543E543FN543LI--GSKKSAF543RNT543LRR543VERE543GYN543FSI543IE543PP 383
Pa      AENL543PFYMDI543GL543TAL543KL543GEE543AR543V543DL543LR543F543DLENK543GKEM543KDL543RY543TW543NR543GQ543RDGLA543LE543FHE543P 697
```

E657 -> E657D, E657Q

E658 -> E658D, E658Q

K654 -> K654S, K654Q

|     |                                                                  |     |
|-----|------------------------------------------------------------------|-----|
| Lm  | FNHDTWTTLRAVSDEWLDGR--EEKGFSLGFFDTYYLEQAPLAI AKNGE-GTIVGFASMM    | 721 |
| Li  | FNNE MWKTLRAVSDEWLDGR--EEKGFSLGFFDTYYLEQADLALAKNAD-GTVVGFASMM    | 721 |
| Cp2 | FSREFLDYLKEISDEWLDGR--KEKGF SVGFFDE DYLNKAPLAILRDRE-GEIKAFANIM   | 714 |
| Sa  | FSTEFINELQHVSDLWLDNR--QEMHFSVGEFN E EYLSKAPIGVMRNEE-NEVIAFCSLM   | 720 |
| Se  | FSQDFFNELKYVSDRWLDGR--DEM HFSVGFQFTQPYLSKAPIGV MRDQY-GKMI AFCSLM | 720 |
| Sx  | FSQOMITDLKATSDDWLADK--NEMHFSVGSFDEHYISQAPIGVLKDNE-QSVIAFCTLM     | 720 |
| Bc  | FSDELFEELRKVSDAWLGGK--KEKSFSLSGYFDREYISRAPL ATLSAD-GKIIAFTTFM    | 738 |
| Ba  | FSNELFEELRKVSDAWLGGK--KEKSFSLSGYFDHEYISRAPL ATLSAD-GKIIAFTTFM    | 738 |
| Bs  | FSDAFLEELKQISDEWLGSK--KEKGFSLGFFDPSYLQKAPL AYMKNAE-GEIVAFANVM    | 731 |
| Cp1 | FNNEVVSQ LKEISDKWLGD R--KEKGFSLGWFSEDIQRSPAILKNEENKIMGFVTIM      | 441 |
| Pa  | -GQAPLDELKATSDAWLGGKQVREKGFSLGRETTPAYLNFRR AIVRHQG--KPVAFANLL    | 754 |

**S709 -> S709A, S709N      Y732 -> Y732A**  
**D710 -> D710A, D710N**  
**E720 -> E720Q**  
**S724 -> S724A, S724N**

|     |                                                                |     |
|-----|----------------------------------------------------------------|-----|
| Lm  | PSYTDE-MTSDLMRYSKEAPSGIMDFLFINLFEKAKEDGFQTFNAGMAPLANV GESKYA   | 780 |
| Li  | PSYTDE-MTSDLMRYSKEAPSGIMDFLFINLFEKAKEDGFQTFNAGMAPLANV GESKYA   | 780 |
| Cp2 | YMYDDE-SFSVDLMRFSKNTPRGVDMDFMINLIEYGKEKGYETFNMGMAPLANV GLSKYA  | 773 |
| Sa  | PTYFND-AISVDLIRWLP ELDLPLMDGLYLHMLLWSKEQGYTKFNMC MATLSNVGQLHYS | 779 |
| Se  | PTHFND-AISVDLIRWLP ELDLPLMDGLYLHMLLWGQEKGYKAFNMGMATLSNVGQLHYS  | 779 |
| Sx  | PTYYNG-VISVDLIRWKQDIELPLMDSLYLNMLLWSKDNNYEHFNMG MATLSNVGQIPYS  | 779 |
| Bc  | PVYQDG-SLSVDLMRYYPDAPSGIMDAIFIHFLQWAKENEYHSEFNIGMAPLSNVGLSTQS  | 797 |
| Ba  | PVYQDG-SLSVDLMRYYPDAPSGIMDAIFIHFLQWAKENEYHSEFNIGMAPLSNVGLSTQS  | 797 |
| Bs  | PMYQEG-EISVDLMRYRGDAPNGIMDALFIRMFLWAKEEGCTSENMGMATLANVGTAF TS  | 790 |
| Cp1 | DANDGGETVAIDL MRIDKDAPNASMDYLMNLFLTFKEKGYKYFSLGEAPLSNVGFNTHS   | 501 |
| Pa  | ETDSRE-LASDLMRVHPDAPKLTMEFLMLGLLHYKAQGHARFSLGMVPLAGLQPRRGA     | 813 |

**S763 -> S763A, S763N**  
**D765 -> D765A, D765N**  
**R768 -> R768S, R768Q**  
**M778 -> M778A**

|     |                                                               |     |
|-----|---------------------------------------------------------------|-----|
| Lm  | FLGERLAGLVYRYSQGFYGFKGLRNFKSKYVTEWEQKFVAFRKRSSIAFTMLQLMILV GK | 840 |
| Li  | FLGERLAGLVYRYSQGFYGFKGLRNFKSKYVTEWEQKFVAFRKRSSIAFTMLQLMILV GK | 840 |
| Cp2 | FWNEKLALQFYENGQALYSFKGLRRFKEKFSHNWEYKYIAYRRNTSILITVIQAAIVCSR  | 833 |
| Sa  | YLRRERLAGRVFEHFNGLYRFQGLRRYKSKYNPNWEPFLVYRKDNSLWESLSKVMRVIRH  | 839 |
| Se  | YLRRERLAGRVFEHFNGLYRFQGLRRYKSKYGNWEPFLVYRKDSSLWESMLKVMRVIRH   | 839 |
| Sx  | FYGERIAGRVEHFNGLYRFQGLRRYKKEKFNPKWEPFLVYRKHQSLWVSMKVMRVIRK    | 839 |
| Bc  | FWSERVAAAI FNNVRYTYSFSGLRHFKEKYKPAWSGKYLAFRKNHSLPITMLSVTKLIGK | 857 |
| Ba  | FWSERVAAAI FNNVRYTYSFSGLRHFKEKYKPAWSGKYLAFRKNHSLPITMLSVTKLIGK | 857 |
| Bs  | FWSERFAAVIFNNVRYMYSFSGLRAFKEKYKPEWRGKYLA YRKNRSLSVTMFLVTRLIGK | 850 |
| Cp1 | HLQEKLARLVYNSGNIFYSFQGLRRYKSKFSPWQPRYLAYPKFMSLPEVFINCLLIAN    | 561 |
| Pa  | PLTQRLGALVFRRGEQFYNFQGLRRFKDKFQPDWEPYLA VPAGLDPLVALADTAALIAG  | 873 |

**Y831 -> Y831A**  
**R837 -> R837S, R837Q**  
**K840 -> K840S, K840Q**  
**K842 -> K842S, K842Q**

|     |                           |     |
|-----|---------------------------|-----|
| Lm  | KRPLANSQVVLDFPLEEETKKPDSE | 865 |
| Li  | KRPLANNQVVLDFPLNEEIEKPDSE | 865 |
| Cp2 | NRNVDESIVVRNLKSLIK-----   | 851 |
| Sa  | K-----                    | 840 |
| Se  | K-----                    | 840 |
| Sx  | NN-----                   | 841 |
| Bc  | RKNS-----                 | 861 |
| Ba  | RKNS-----                 | 861 |
| Bs  | SKKDSV-----               | 856 |
| Cp1 | SKERVEKK-----             | 569 |
| Pa  | GLTGLVKR-----             | 881 |

## Supplemental Figure S2

### FIG. S2. Activity of mutant A-PGS proteins under *in vivo* conditions.

Separation of polar membrane lipids by 2D-TLC and detection by 5% (w/v) molybdotophosphoric acid staining is shown. Lipids were extracted from *E. coli* BL21 ( $\lambda$ DE3) cells overproducing different A-PGS<sub>543-881</sub> mutants. Positions of phosphatidylethanolamine (PE), phosphatidylglycerol (PG) and diphosphatidylglycerol (DPG) are shown. A-PG is indicated by an arrow.

A-PG formation by the wild type A-PGS<sub>543-881</sub> protein is shown in *panel A*. A-PG formation by the mutant enzymes in the *in vivo* assay were classified as: +++, activity comparable to wild type enzyme (mutant protein K654S, *panel B*); +, decreased activity when compared to wild type enzyme (mutant protein Y732A, *panel C*); -, no detectable A-PGS activity (mutant protein D765N, *panel D*).

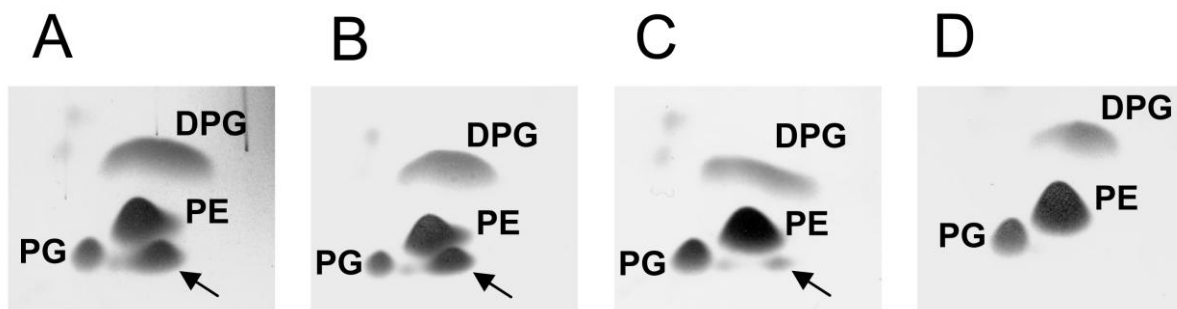

### References Supporting Information

- Grant, S.G., Jessee, J., Bloom, F.R., and Hanahan, D. (1990) Differential plasmid rescue from transgenic mouse DNAs into *Escherichia coli* methylation-restriction mutants. *Proc Natl Acad Sci U S A* **87**: 4645-4649.
- Kitagawa, M., Ara, T., Arifuzzaman, M., Ioka-Nakamichi, T., Inamoto, E., Toyonaga, H., and Mori, H. (2005) Complete set of ORF clones of *Escherichia coli* ASKA library (a complete set of *E. coli* K-12 ORF archive): unique resources for biological research. *DNA Res* **12**: 291-299.
- Klein, S., Lorenzo, C., Hoffmann, S., Walther, J.M., Storbeck, S., Piekarski, T., *et al.* (2009) Adaptation of *Pseudomonas aeruginosa* to various conditions includes tRNA-dependent formation of alanyl-phosphatidylglycerol. *Mol Microbiol* **71**: 551-565.
